# Supplementary material for: Genome-wide evidence for selection acting on single amino acid repeats
Source: HighWire-hosted journal article supplement (doi:10.1101/gr.101246.109), 2010-01-07

**Supplementary material 3.** Homopolymer size variation across five *Drosophila* species in relationship with exon splicing pattern in *D. melanogaster*. The homopolymer size variation is assessed using the total length of a neighbor joining tree built using the absolute size variation between species. CSE: constitutively spliced exon, ONE: exon found in gene with a single annotated protein isoform. The box shows the first and third quartiles, the dotted lines extend to the 5<sup>th</sup> and 95<sup>th</sup> percentiles, the size of the notch indicates level of uncertainty associated with the median.

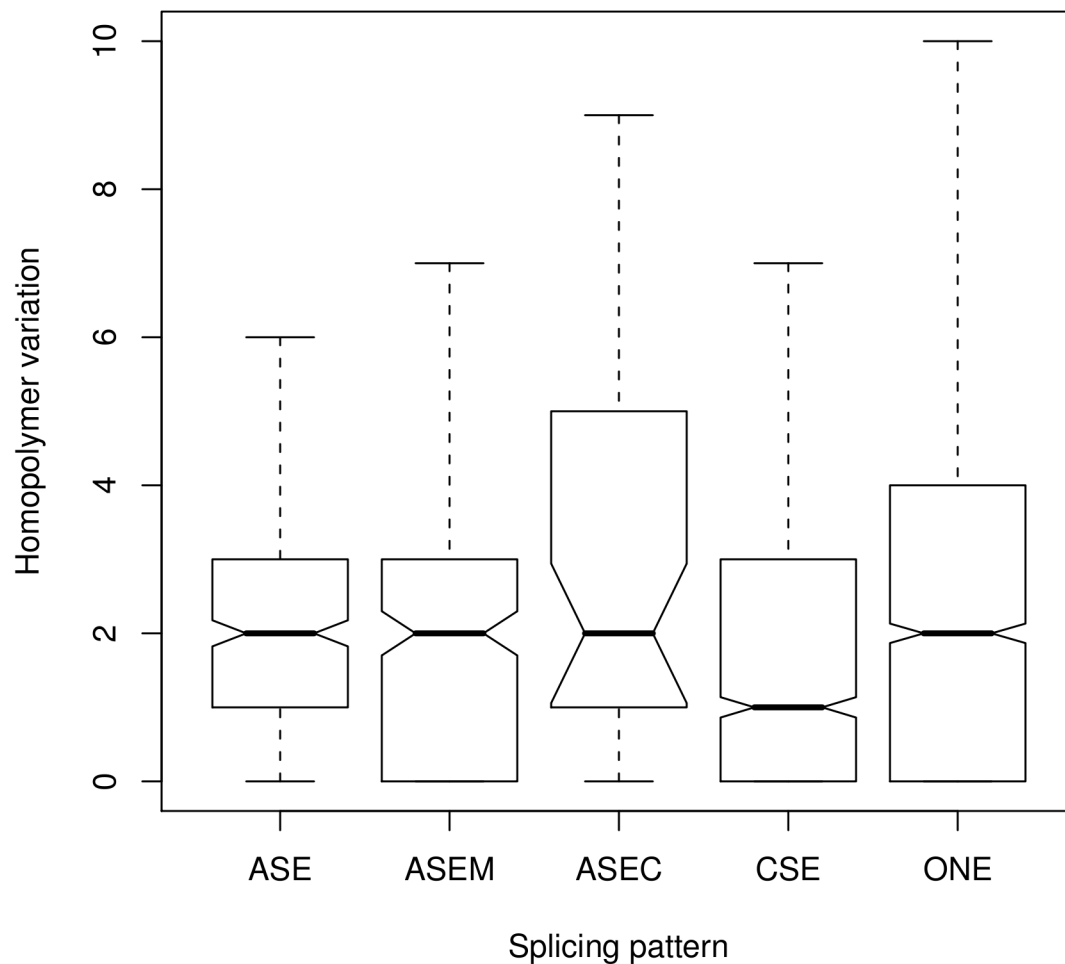

Supplement: supplementary_figure_3_new.pdf [file supplementary_figure_3_new.pdf]
