# Supplementary material for: Genome-wide evidence for selection acting on single amino acid repeats
Source: HighWire-hosted journal article supplement (doi:10.1101/gr.101246.109), 2010-01-07

**Supplementary material 5.** Comparison of homocodon sequence size relative to exon size in *C. elegans* (A), *D. rerio* (B), *M. musculus* (C) and *H. sapiens* (D). CSE: constitutively spliced exon, ONE: exon found in gene with a single annotated protein isoform. The box shows the first and third quartiles, the dotted lines extend to the 5<sup>th</sup> and 95<sup>th</sup> percentiles, the size of the notch indicates level of uncertainty associated with the median.

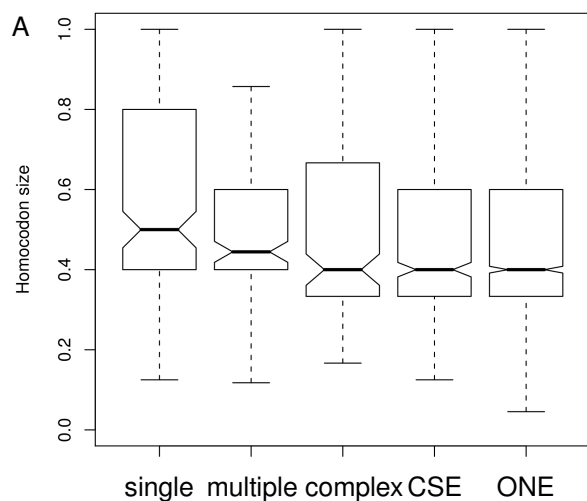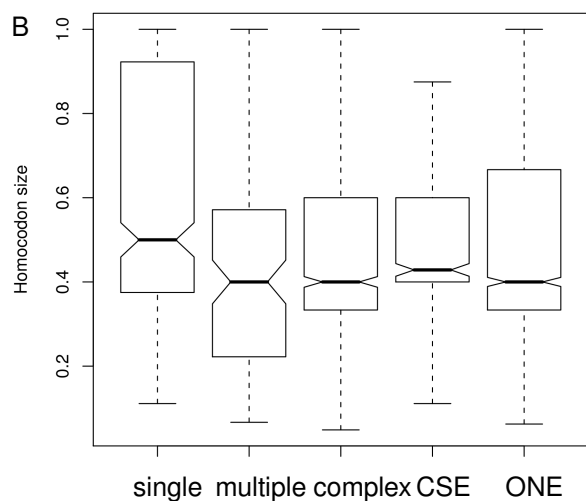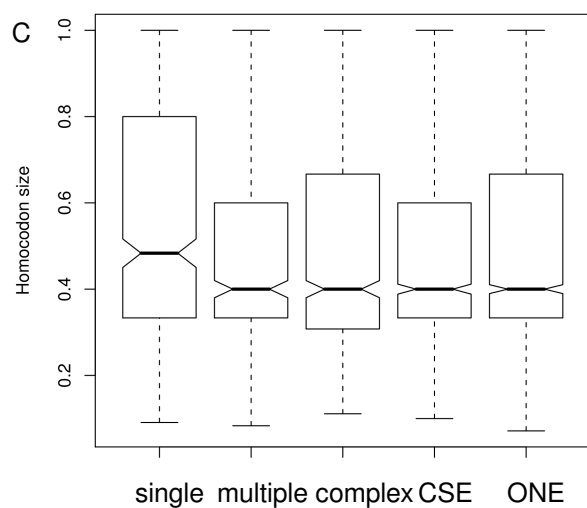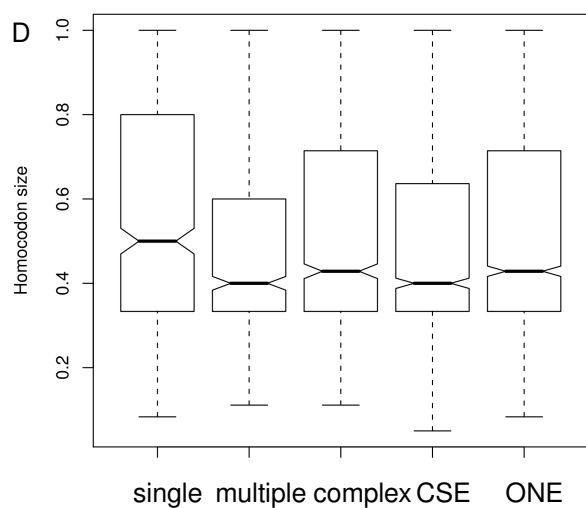

Supplement: supplementary_figure_5_new.pdf [file supplementary_figure_5_new.pdf]
